# Supplementary material for: Cellular uptake and viability switching in the properties of lipid coated carbon quantum dots for potential bioimaging and therapeutics
Source: Royal Society of Chemistry journal article supplement (doi:10.1039/d4na00306c), 2024-01-01
Supplement: d4na00306c1.pdf [file d4na00306c1.pdf]

## Cellular uptake and viability switch in the properties of lipid coated carbon quantum dots for potential bioimaging and therapeutics

Sweny Jain<sup>1a</sup>, Nidhi Sahu<sup>1b</sup>, Dhiraj Bhatia<sup>a,\*</sup> and Pankaj Yadav<sup>a,\*</sup>

- Department of Biological Sciences and Engineering, Indian Institute of Technology Gandhinagar, Palaj, Gujarat 382355, India.
- Department of Bioengineering and Biotechnology, Birla Institute of Technology, Mesra Ranchi, Jharkhand-835 215, India

1 represents authors contributed equally

\*Correspondence to: [dhiraj.bhatia@iitgn.ac.in](mailto:dhiraj.bhatia@iitgn.ac.in) and [yadav\\_pankaj@iitgn.ac.in](mailto:yadav_pankaj@iitgn.ac.in)

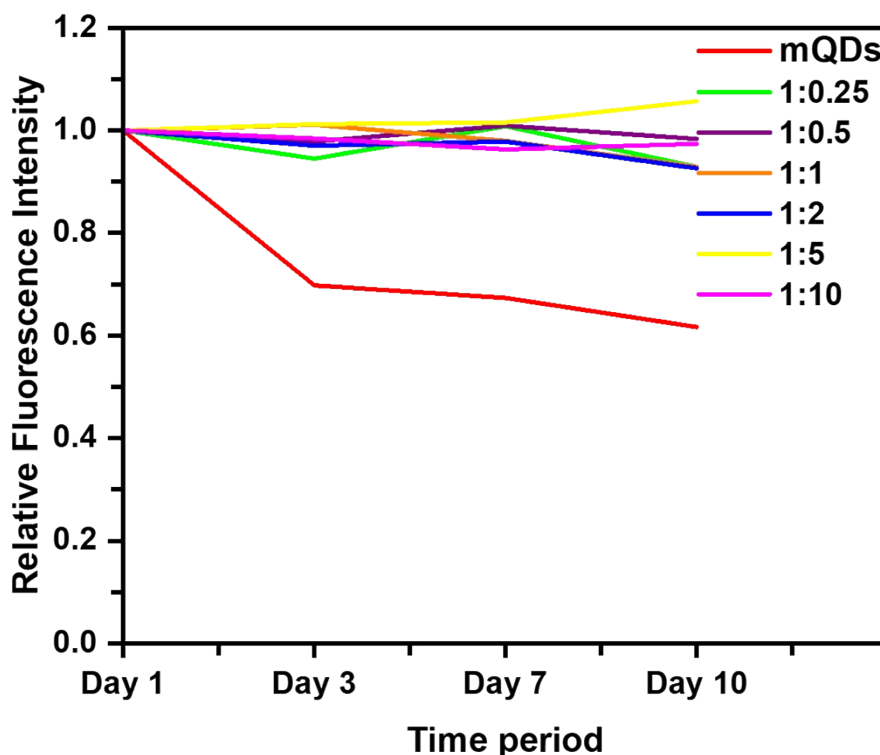

**Figure S1:** The relative fluorescence intensity was measured for 10 days. It shows that the fluorescence intensity of mQDs has dropped to about 61.8% than on day 1 at 679nm. Whereas in case of mQDs coated with DOTMA (1:0.25, 1:0.5, 1:1, 1:2, 1:5, 1:10) we observed that the fluorescence intensity was 93%, 98%, 93%, 93%, 106%, 97%. We observed that in ratio 1:5 the fluorescence is increasing with time.

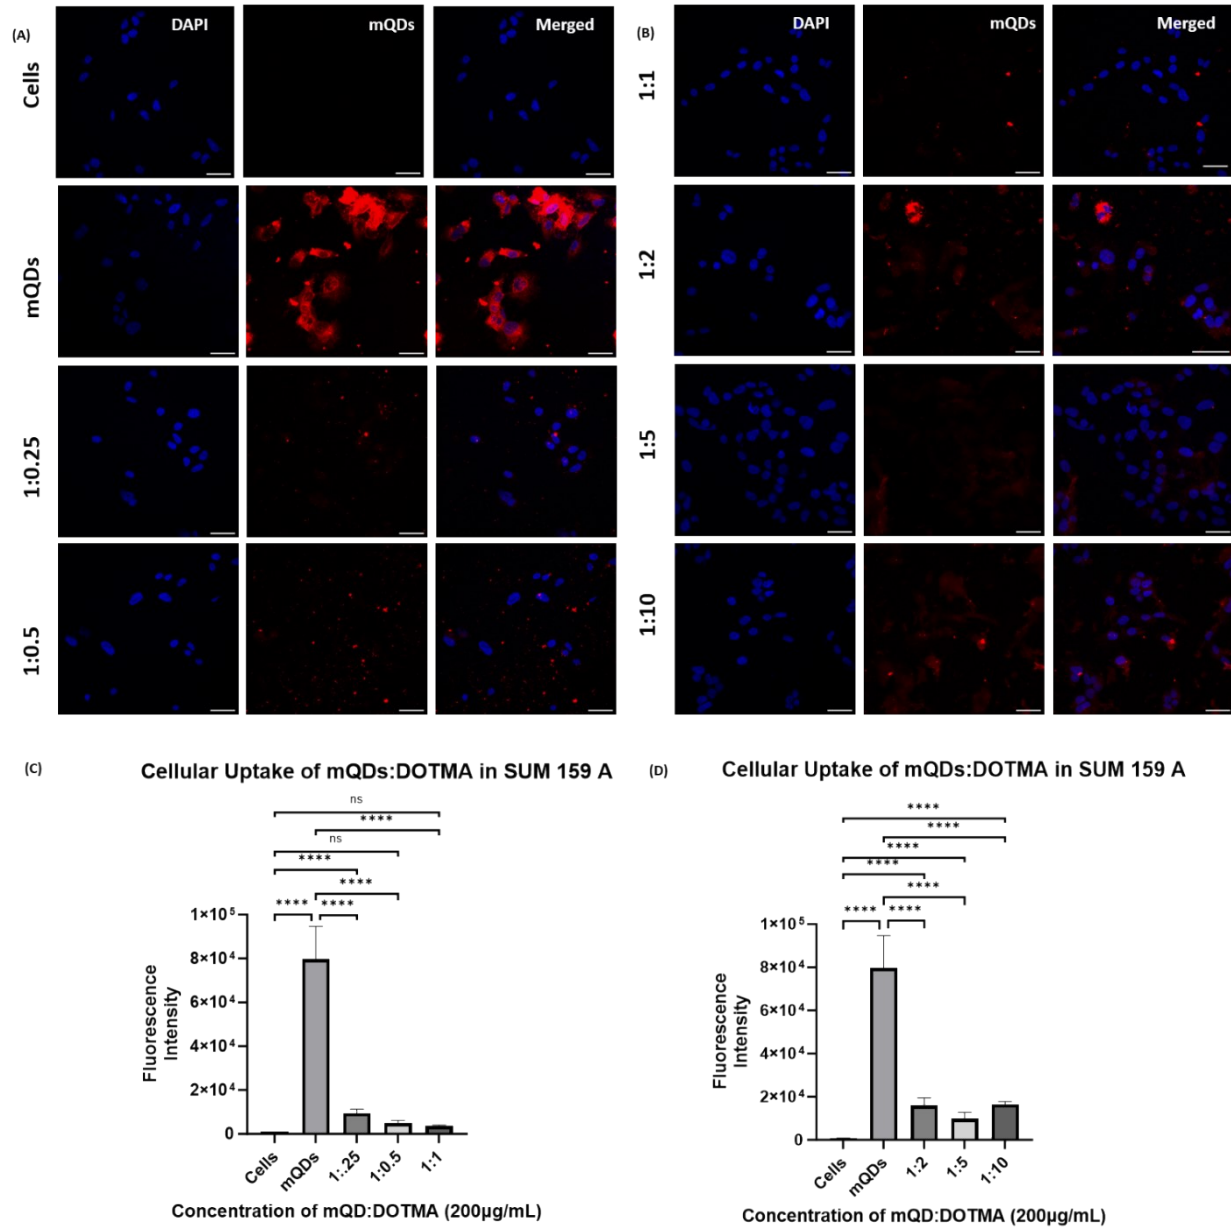

**Figure S2: - Cellular uptake of mQD:DOTMA conjugates in SUM-159A cells.** Concentration - 200µg/mL, Scale bar- 5µm (A) Uptake of mQDs and mQD:DOTMA conjugate (1:0.25 and 1:0.5). (B) Uptake of mQD:DOTMA conjugate (1:2, 1:5, 1:10). (C) Quantified fluorescence intensity of mQDs and mQD:DOTMA conjugates (1:0.25, 1:0.5, 1:1). (D) Quantified fluorescence intensity of mQD:DOTMA conjugates (1:2, 1:5, 1:10). The statistical significance was tested by one-way ANOVA in the Prism Software and is represented as \*\*\*\* when  $p < 0.0001$  and ns when there is no significant difference. (n=30)

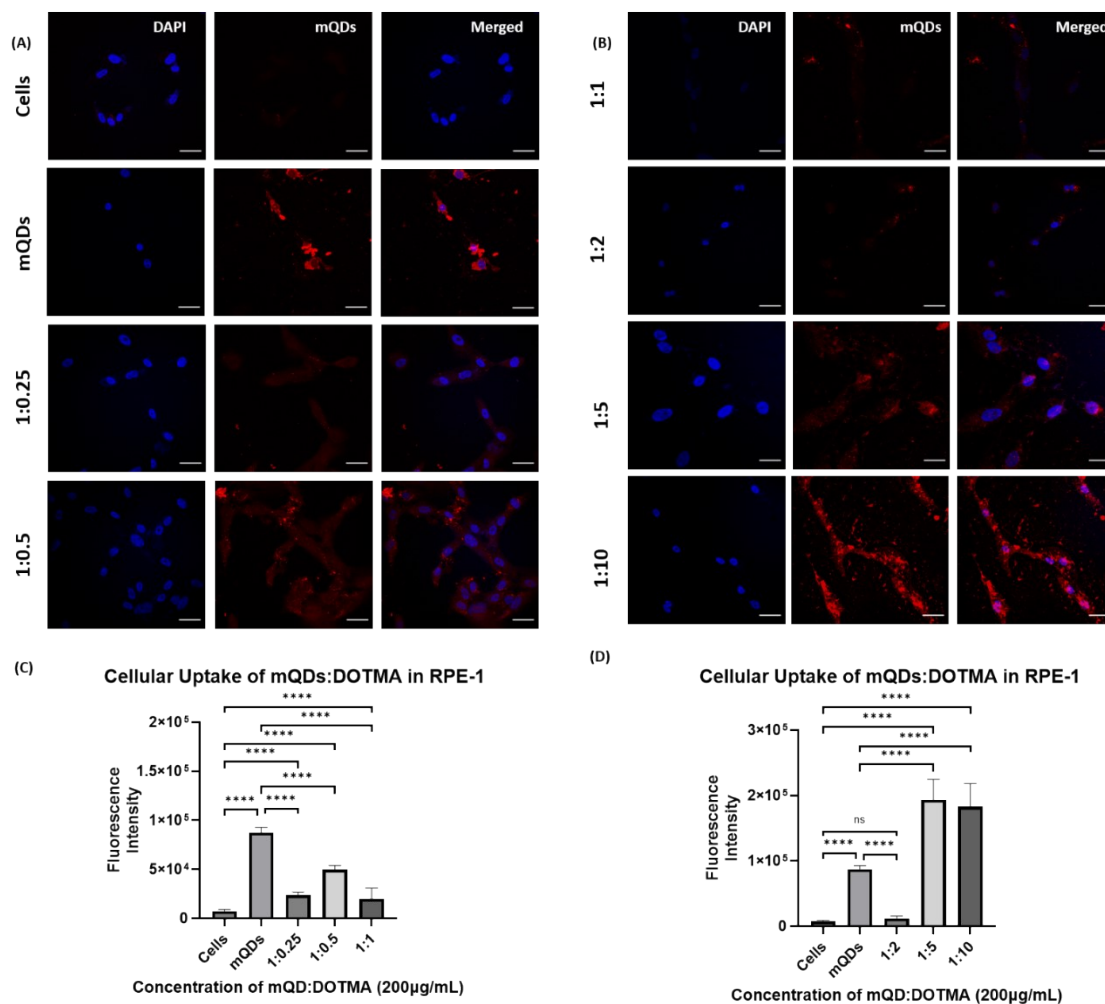

**Figure S3: - Cellular uptake of mQD:DOTMA conjugates in RPE-1 cells.** Concentration - 200µg/mL, Scale bar- 5µm (A) Uptake of mQDs and mQD:DOTMA conjugate (1:0.25 and 1:0.5). (B) Uptake of mQD:DOTMA conjugate (1:2, 1:5, 1:10). (C) Quantified fluorescence intensity of mQDs and mQD:DOTMA conjugates (1:0.25, 1:0.5, 1:1). (D) Quantified fluorescence intensity of mQD:DOTMA conjugates (1:2, 1:5, 1:10). The statistical significance was tested by one-way ANOVA in the Prism Software and is represented as \*\*\*\* when  $p < 0.0001$  and ns when there is no significant difference. (n=30)
